# Supplementary material for: NBS1 I171V variant underlies individual differences in chromosomal radiosensitivity within human populations
Source: PubMed Central journal article supplement (PMC8490386; doi:10.1038/s41598-021-98673-7), 2021-10-04
Supplement: 41598_2021_98673_MOESM1_ESM.pdf [file 41598_2021_98673_MOESM1_ESM.pdf]

## Supplementary Information

Figures S1 to S5 and Tables S1 to S5

### ***NBS1* I171V variant underlies individual differences in chromosomal radiosensitivity within human populations**

Keita Tomioka<sup>1,2,#</sup>, Tatsuo Miyamoto<sup>1,#</sup>, Silvia Natsuko Akutsu<sup>1</sup>, Hiromi Yanagihara<sup>1</sup>, Kazumasa Fujita<sup>1</sup>, Ekaterina Royba<sup>1,3</sup>, Hiroshi Tauchi<sup>4</sup>, Takashi Yamamoto<sup>5</sup>, Iemasa Koh<sup>6</sup>, Eiji Hirata<sup>6</sup>, Yoshiki Kudo<sup>6</sup>, Masao Kobayashi<sup>2</sup>, Satoshi Okada<sup>2</sup>, and Shinya Matsuura<sup>1,\*</sup>

<sup>1</sup>*Department of Genetics and Cell Biology, Research Institute for Radiation Biology and Medicine, Hiroshima University, Hiroshima 734-8553, Japan*

<sup>2</sup>*Department of Pediatrics, Graduate School of Biomedical and Health Sciences, Hiroshima University, Hiroshima 734-8551, Japan*

<sup>3</sup>*Center for Radiological Research, Columbia University Irving Medical Center, New York, 10032, USA*

<sup>4</sup>*Department of Biological Sciences, Faculty of Science, Ibaraki University, Mito 310-8512, Japan*

<sup>5</sup>*Program of Mathematical and Life Sciences, Graduate School of Integrated Sciences for Life, Hiroshima University, Higashi-Hiroshima 739-8526, Japan*

<sup>6</sup>*Department of Obstetrics and Gynecology, Graduate School of Biomedical and Health Sciences, Hiroshima University, Hiroshima 734-8551, Japan*

<sup>#</sup>These authors contributed equally to this work.

<sup>\*</sup>**Correspondence: e-mail: [shinya@hiroshima-u.ac.jp](mailto:shinya@hiroshima-u.ac.jp)**

**a**

**WT allele**

5'...ACTATATGCACTCATTGTGGACGTCCAATTATAAAACCAGAATACTTTTCTGAATTTCTCAAAGCAG...3'  
I171 (c.511A) PAM Cas9 recognition sequence

▼ Presumptive DSB site

↓ CRISPR/Cas9-mediated editing

**ssODN(100 mer) / Targeted allele**

5'...ACTATATGCACTCATTGTGGACGTCCAGTTATAAAACCTGAGTATTTTCTGAATTCCTCAAAGCAG...3'  
V171 (c.511G) EcoRI

**b** *Nbs1*<sup>+/+</sup> clone 1

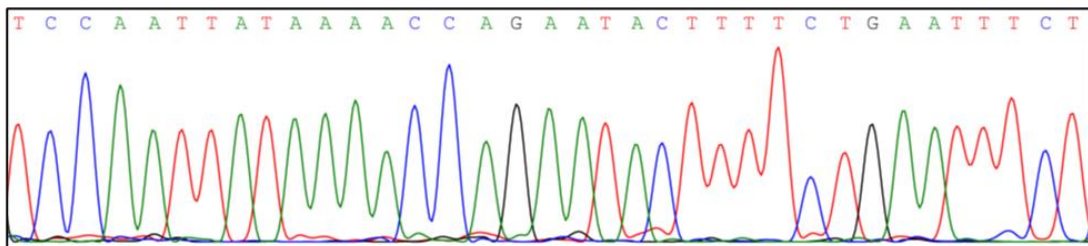

**c** *Nbs1*<sup>I171V/+</sup> clone 1

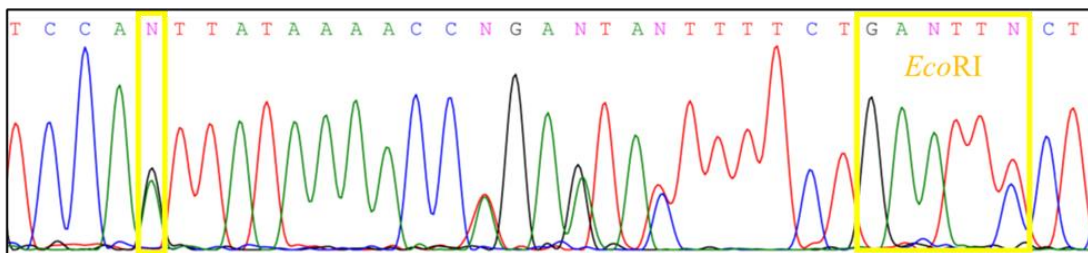

**d** *Nbs1*<sup>I171V/I171V</sup> clone 1

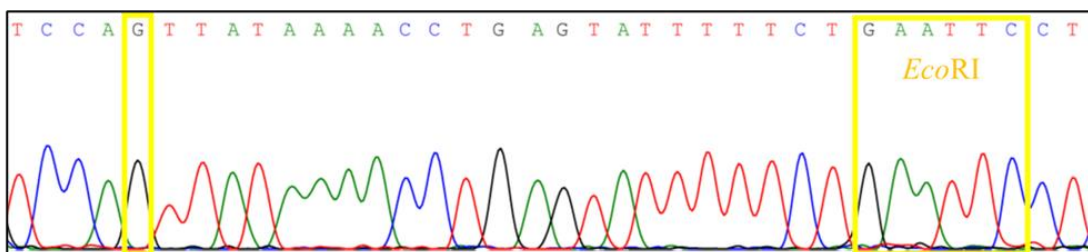

**Figure S1. Generation of *Nbs1* I171V knock-in mice.**

(a) Targeting strategy for *Nbs1* I171V knock-in using the CRISPR/Cas9 system. Blue bases indicate silent mutations.

(b–d) Sanger sequencing of *Nbs1*<sup>+/+</sup>-MEF clone 1 (b), *Nbs1*<sup>I171V/+</sup>-MEF clone 1 (c), and *Nbs1*<sup>I171V/I171V</sup>-MEF clone 1

(d). A single base substitution of the *Nbs1* I171V variant and a silent *EcoRI* site are indicated by yellow boxes.

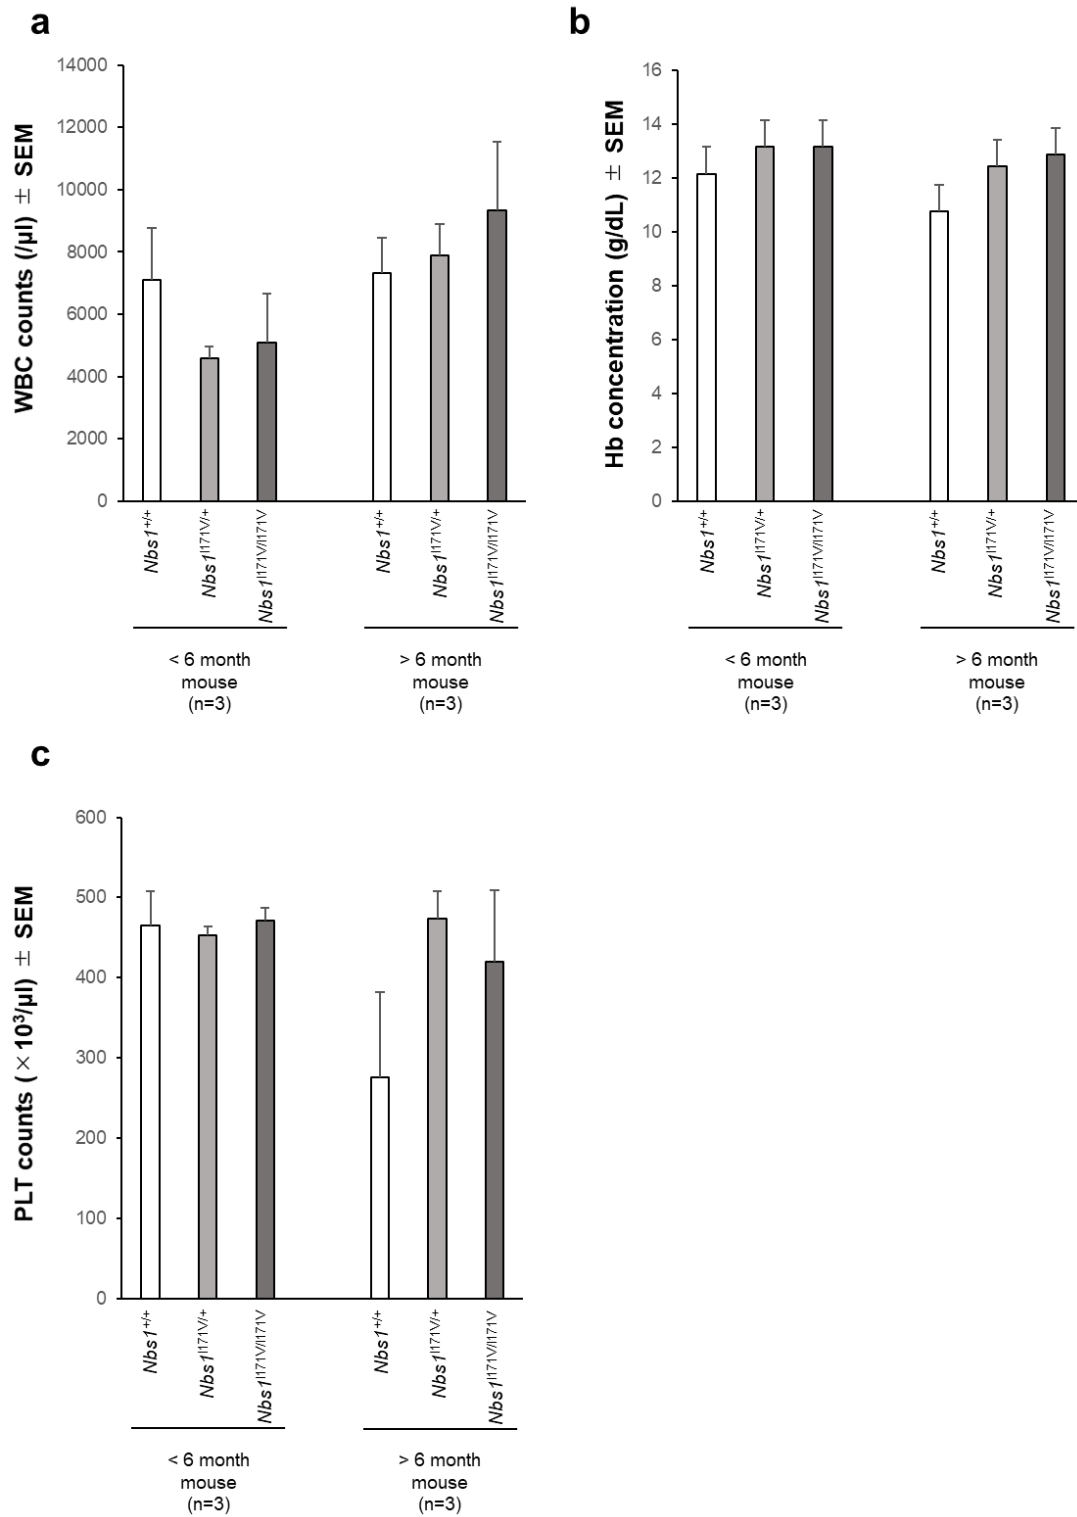

**Figure S2. Complete blood counts in the *Nbs1* I171V knock-in mice.**

(a) White blood cell (WBC) counts, (b) hemoglobin (Hb) concentrations, and (c) platelet (PLT) counts of *Nbs1*<sup>+/+</sup>, *Nbs1*<sup>I171V/+</sup>, and *Nbs1*<sup>I171V/I171V</sup> mice (mean $\pm$ SEM; no significant change in each t-test parameter; n=3).

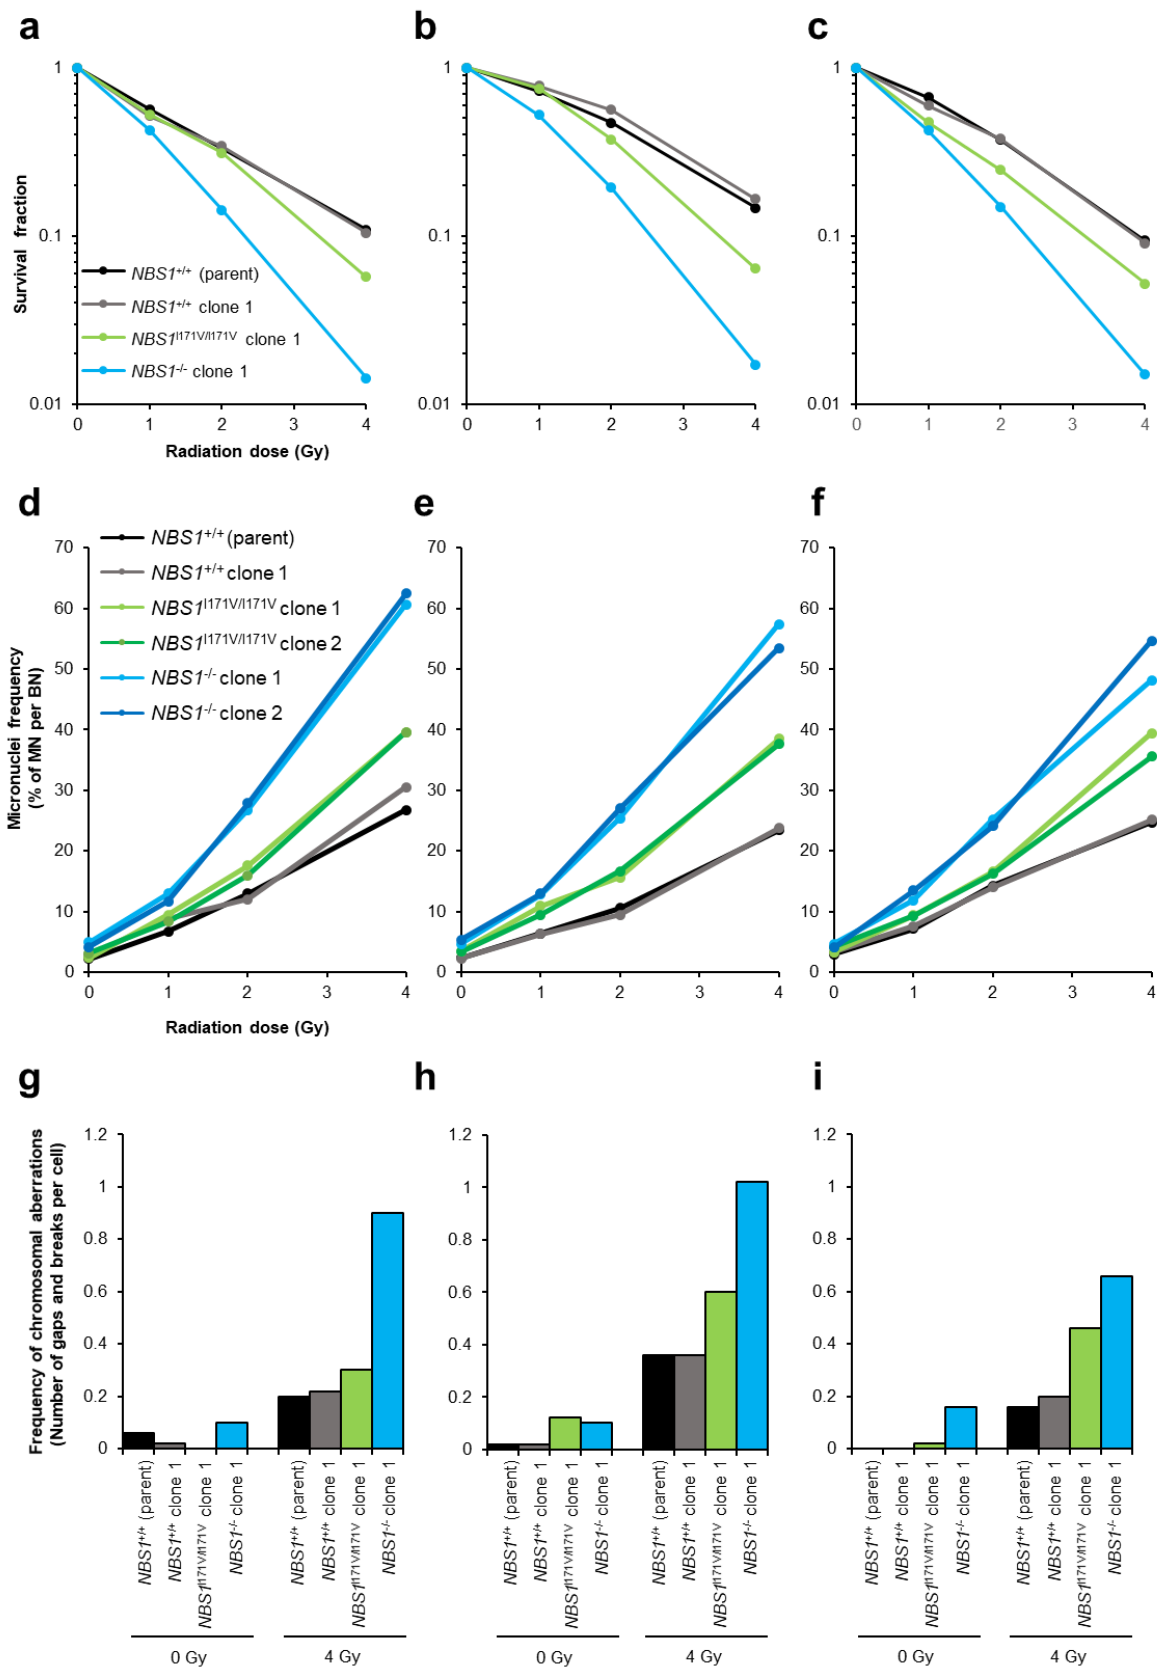

**Figure S3. Three independent colony survival, CBMN, and chromosomal aberration assays in *NBS1* I171V knock-in HCT116 cell clones.**

Three graphs showing the results of three independent experiments: survival fractions (a–c), IR-induced MN formation (d–f), and IR-induced chromosomal aberration (g–i).

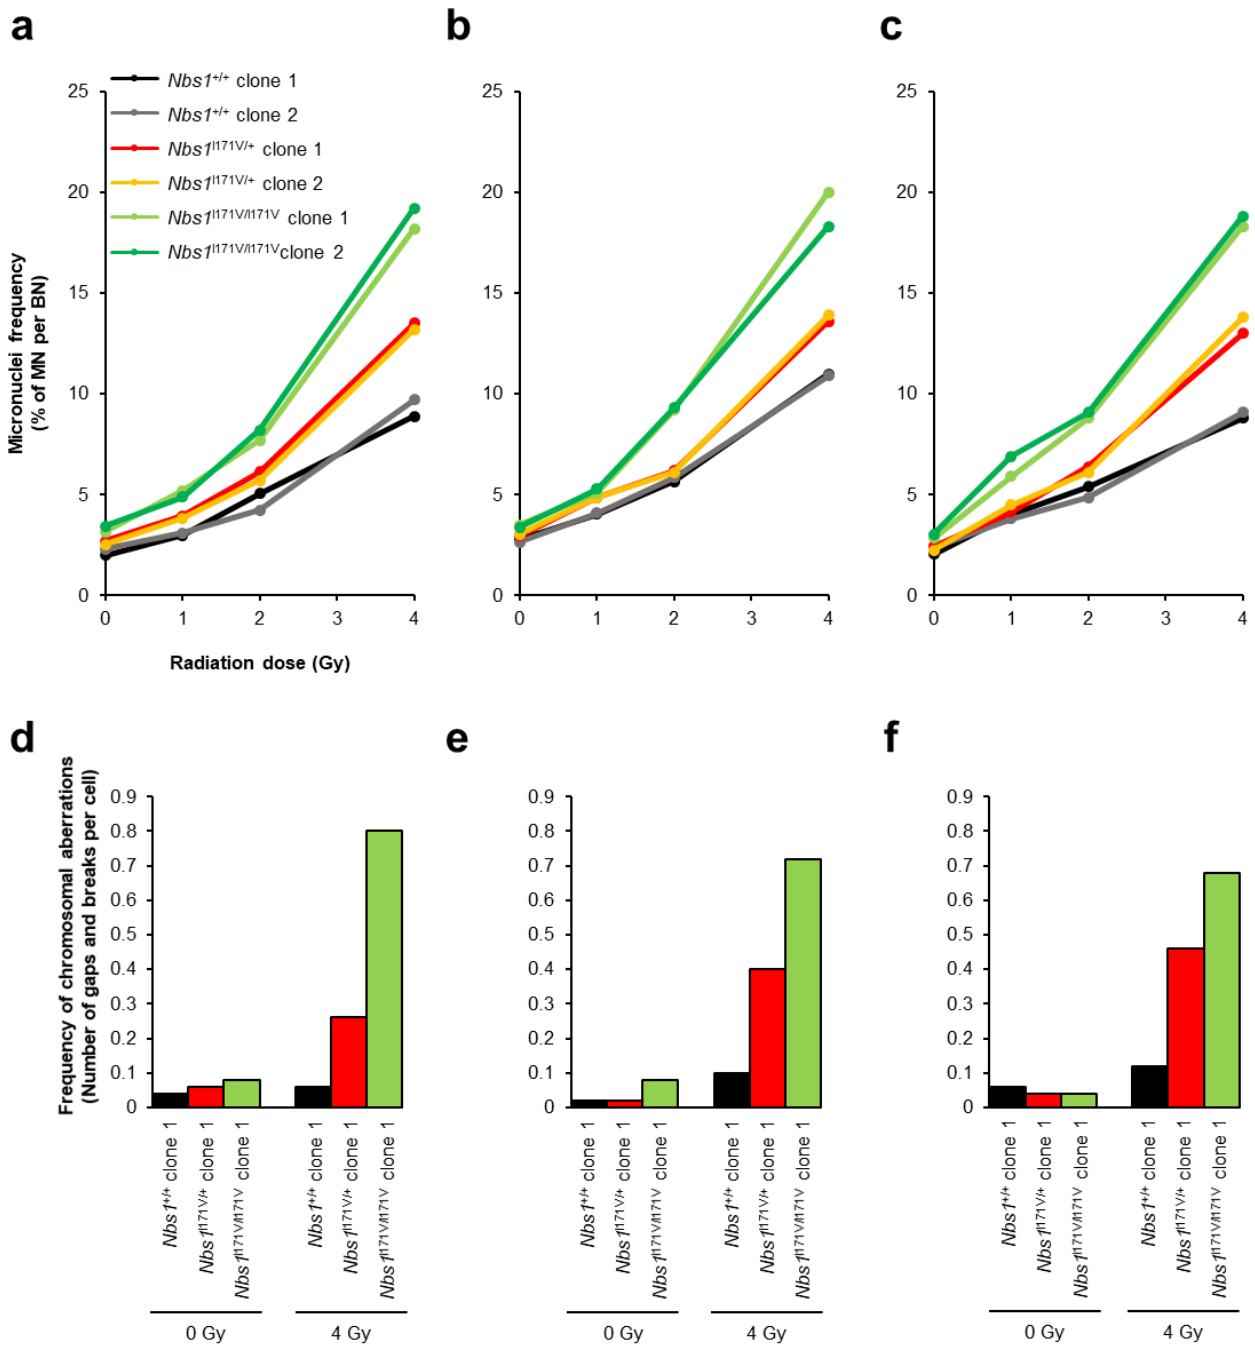

**Figure S4. Three independent CBMN and chromosomal aberration assays in the *Nbs1* I171V knock-in MEF clones.**

Three graphs showing the results of three independent experiments: percentage of IR-induced MN formation (a–c) and IR-induced chromosomal aberration (d–f).

NBS1 knock-in HCT116 cells  
NBS1 95 kDa

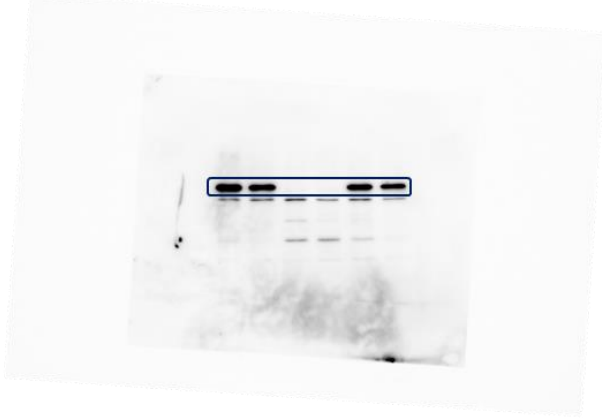

GAPDH 37 kDa

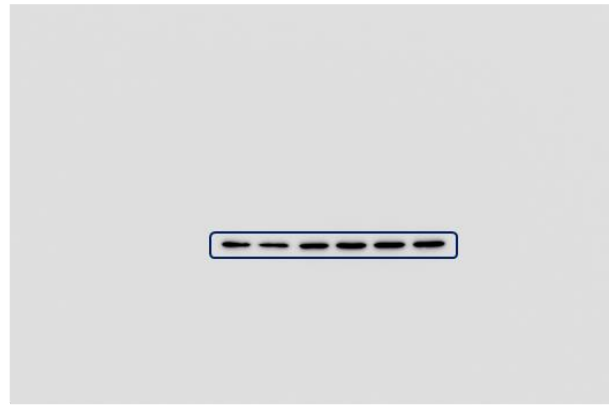

MRE11 81 kDa

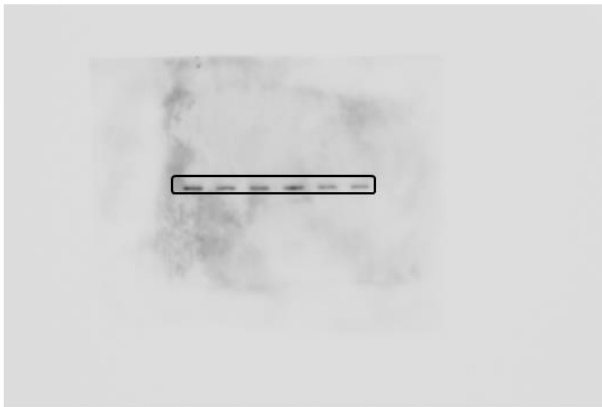

Nbs1 knock-in MEFs  
NBS1 95 kDa

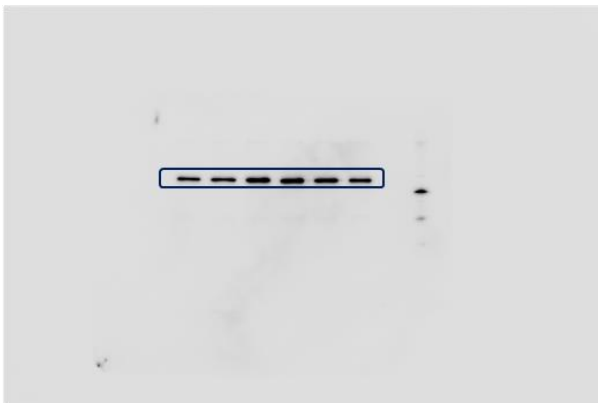

GAPDH 37 kDa

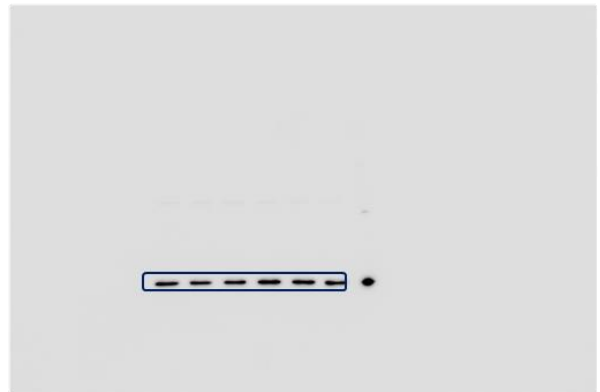

**Figure S5. Uncropped images of western blotting data shown in the main text.**

|                                    |                                    | 1Gy   | 2Gy    | 4Gy     |
|------------------------------------|------------------------------------|-------|--------|---------|
| <i>NBSI</i> <sup>+/+</sup>         | <i>NBSI</i> <sup>I171V/I171V</sup> | 0.51  | 0.14   | 0.013   |
| <i>NBSI</i> <sup>+/+</sup>         | <i>NBSI</i> <sup>-/-</sup>         | 0.023 | 0.0027 | 0.00081 |
| <i>NBSI</i> <sup>I171V/I171V</sup> | <i>NBSI</i> <sup>-/-</sup>         | 0.24  | 0.021  | 0.00029 |

**Table S1. T-test of survival fraction in *NBSI* I171V knock-in HCT116 cell clones.**

|                                    |                                    | 0Gy      | 1Gy        | 2Gy         | 4Gy        |
|------------------------------------|------------------------------------|----------|------------|-------------|------------|
| <i>NBSI</i> <sup>+/+</sup>         | <i>NBSI</i> <sup>I171V/I171V</sup> | 0.061    | 0.00094    | 0.00047     | 0.0000014  |
| <i>NBSI</i> <sup>+/+</sup>         | <i>NBSI</i> <sup>-/-</sup>         | 0.000022 | 0.00000045 | 0.000000055 | 0.00000016 |
| <i>NBSI</i> <sup>I171V/I171V</sup> | <i>NBSI</i> <sup>-/-</sup>         | 0.0014   | 0.000028   | 0.000000034 | 0.000011   |

**Table S2. T-test of CBMN assay in *NBSI* I171V knock-in HCT116 cell clones.**

|                                    |                                    | 0Gy    | 4Gy     |
|------------------------------------|------------------------------------|--------|---------|
| <i>NBSI</i> <sup>+/+</sup>         | <i>NBSI</i> <sup>I171V/I171V</sup> | 0.37   | 0.034   |
| <i>NBSI</i> <sup>+/+</sup>         | <i>NBSI</i> <sup>-/-</sup>         | 0.0010 | 0.00021 |
| <i>NBSI</i> <sup>I171V/I171V</sup> | <i>NBSI</i> <sup>-/-</sup>         | 0.16   | 0.041   |

**Table S3. T-test of Chromosomal aberration in *NBSI* I171V knock-in HCT116 cell clones.**

|                                |                                    | 0Gy     | 1Gy     | 2Gy       | 4Gy         |
|--------------------------------|------------------------------------|---------|---------|-----------|-------------|
| <i>NbsI</i> <sup>+/+</sup>     | <i>NbsI</i> <sup>I171V/+</sup>     | 0.14    | 0.030   | 0.0045    | 0.0000052   |
| <i>NbsI</i> <sup>+/+</sup>     | <i>NbsI</i> <sup>I171V/I171V</sup> | 0.00042 | 0.00043 | 0.0000015 | 0.000000052 |
| <i>NbsI</i> <sup>I171V/+</sup> | <i>NbsI</i> <sup>I171V/I171V</sup> | 0.0054  | 0.0070  | 0.0000027 | 0.000000013 |

**Table S4. T-test of CBMN assay in *NBSI* I171V knock-in MEF clones.**

|                                |                                    | 0Gy         | 4Gy      |
|--------------------------------|------------------------------------|-------------|----------|
| <i>NbsI</i> <sup>+/+</sup>     | <i>NbsI</i> <sup>I171V/+</sup>     | 1           | 0.011    |
| <i>NbsI</i> <sup>+/+</sup>     | <i>NbsI</i> <sup>I171V/I171V</sup> | 0.205106455 | 0.000084 |
| <i>NbsI</i> <sup>I171V/+</sup> | <i>NbsI</i> <sup>I171V/I171V</sup> | 0.205106455 | 0.0064   |

**Table S5. T-test of Chromosomal aberration in *NBSI* I171V knock-in MEF clones.**
